1 **Title: *Burkholderia thailandensis* methylated hydroxy-alkylquinolines: biosynthesis**  
2 **and antimicrobial activity in co-cultures**

3

4 **Authors:** Jennifer R Klaus<sup>a, §</sup>, Charlotte Majerczyk<sup>b, §</sup>, Stephanie Moon<sup>b</sup>, Natalie A.  
5 Eppler<sup>a†</sup>, Sierra Smith<sup>b</sup>, Emily Tuma<sup>b</sup>, Marie-Christine Groleau<sup>c</sup>, Kyle L. Asfahl<sup>d</sup>, Nicole  
6 E. Smalley<sup>d</sup>, Hillary S. Hayden<sup>d</sup>, Marianne Piochon<sup>c</sup>, Patrick Ball<sup>b</sup>, Ajai A. Dandekar<sup>d</sup>,  
7 Charles Gauthier<sup>c</sup>, Eric Déziel<sup>c</sup>, and Josephine R. Chandler<sup>a#</sup>

8 <sup>§</sup>Equal contributors

9 **Affiliations:**

10 <sup>a</sup>Department of Molecular Biosciences, University of Kansas, Lawrence KS 66045;

11 <sup>b</sup>Department of Biology, Oregon State University – Cascades, Bend, OR 97702

12 <sup>c</sup>Centre Armand-Frappier Santé Biotechnologie, Institut national de la recherche  
13 scientifique (INRS), Laval (Québec), Canada H7V 1B7;

14 <sup>d</sup>Department of Microbiology, University of Washington, Seattle WA 98195

15 †Current address: Department of Microbiology, University of Kansas Medical Center,  
16 Kansas City KS 66160

17 **Running title:** Methylated alkylquinolines from *Burkholderia thailandensis*

18 **# Address correspondence to:**

19 Josephine R. Chandler

20 University of Kansas

21 Department of Molecular Biosciences

22 1200 Sunnyside Ave

23 Lawrence, KS 66045

24 jrhandler@ku.edu

25

26 **ABSTRACT (179/250 words)**

27 The bacterium *Burkholderia thailandensis* produces an arsenal of secondary metabolites  
28 that have diverse structures and roles in the ecology of this soil-dwelling bacterium. In  
29 liquid co-culture experiments, *B. thailandensis* secretes an antimicrobial that nearly  
30 eliminates another soil bacterium, *Bacillus subtilis*. To identify the antimicrobial, we used  
31 a transposon mutagenesis approach. This screen identified antimicrobial-defective  
32 mutants with insertions in the *hmqA*, *hmqC* and *hmqF* genes involved in biosynthesis of a  
33 family of 2-alkyl-4(1*H*)-quinolones called 4-hydroxy-3-methyl-2-alkenylquinolines  
34 (HMAQs), which are closely related to the *Pseudomonas aeruginosa* 4-hydroxy-2-  
35 alkylquinolines (HAQs). Insertions also occurred in the previously uncharacterized gene  
36 BTH\_III1576. Results confirm that BTH\_III1576 is involved in generating *N*-oxide  
37 derivatives of HMAQs (HMAQ-NO) in *B. thailandensis* and that HMAQ-NOs are  
38 sufficient to eliminate *B. subtilis* in co-cultures. Moreover, synthetic HMAQ-NO is ~50-  
39 fold more active than HMAQ. Both the methyl group and the length of the carbon side  
40 chain account for high activity of HMAQ-NO against *B. subtilis*. The results provide new  
41 information on the biosynthesis and activities of HMAQs and reveal new insight into  
42 how these molecules might be important for the ecology of *B. thailandensis*.

43

44

45

46

47

48

49

50 **IMPORTANCE (120 words)**

51 The soil bacterium *Burkholderia thailandensis* produces 2-alkyl-4(1*H*)-quinolones,  
52 mostly methylated 4-hydroxy-alkenylquinolines, a family of relatively unstudied  
53 metabolites similar to molecules also synthesized by *Pseudomonas aeruginosa*. Several  
54 of the methylated 4-hydroxy-alkenylquinolines have antimicrobial activity against other  
55 species. We show that *N*-oxidated methyl-alkenylquinolines are particularly antimicrobial  
56 and sufficient to kill *Bacillus subtilis* in co-cultures. We confirmed their biosynthesis  
57 requires the previously unstudied protein HmqL. These results provide new information  
58 about the biology of 2-alkyl-4(1*H*)-quinolones, particularly the methylated 4-hydroxy-  
59 alkenylquinolines, which are unique to *B. thailandensis*. This study also has importance  
60 for understanding *B. thailandensis* secondary metabolites and has implications for  
61 potential therapeutic development.

62

## 63 INTRODUCTION

64 The saprophytic  $\beta$ -Proteobacteria *Burkholderia thailandensis* is closely related to two  
65 pathogens, *B. pseudomallei* and *B. mallei*, which are the causative agents of melioidosis  
66 and glanders, respectively (1, 2). *B. pseudomallei* is also a saprophyte and causes  
67 respiratory or skin infections in humans following exposure to organisms in the  
68 environment, such as through skin contact with soil (3). *B. mallei* is a host-adapted  
69 pathogen and is spread to humans from horses and other ungulates, in which it is endemic  
70 in some regions (4). Because *B. pseudomallei* and *B. mallei* are Tier 1 Select Agents and  
71 require handling in BSL-3-level laboratory conditions, *B. thailandensis* is often used as a  
72 surrogate to study biology and virulence mechanisms of these pathogens (5). The  
73 development of versatile genetic techniques (6-9) and improvements in mouse models of  
74 melioidosis (10) have greatly improved the ability to study the biology of this relatively  
75 understudied group.

76 There has been much interest in elucidating the arsenal of small molecules  
77 produced by *B. thailandensis*, where there are at least 13 polyketide synthesis (PKS) gene  
78 clusters, with many of them conserved in *B. mallei* and/or *B. pseudomallei*. Although  
79 many of these metabolites have now been identified, only a few have been studied in  
80 much detail. One of the best studied is bactobolin (11, 12), which blocks translation by  
81 binding to a unique site in the 50S ribosomal subunit (13). Another PKS antibiotic is  
82 malleilactone (14, 15), and malleicyprol, a more toxic product of the malleilactone  
83 biosynthetic gene cluster (16), which contribute to virulence of *B. pseudomallei* (17). *B.*  
84 *thailandensis* also produces thailandenes, a group of polyenes with activity against Gram-  
85 positive bacteria (18). As with many bacterial natural products, malleilactone and  
86 thailandenes are not produced under standard laboratory conditions (14, 15, 18). Studies  
87 of these molecules were possible through genetic (14, 15) or chemical (19) elicitation of  
88 the gene clusters or through phenotype-based screening approaches (18).

89 Most of the PKS gene clusters are unique to this group of *Burkholderia*. A few of  
90 them have analogous biosynthesis pathways in other *Burkholderia* species or even  
91 beyond the *Burkholderia*. For example, the *hmqABCDEFG* operon coding for enzymes  
92 responsible for the biosynthesis of a family of 2-alkyl-4(1*H*)-quinolones named 4-

93 hydroxy-3-methyl-2-alkenylquinolines (HMAQs) are found in *B. thailandensis*, *B.*  
94 *pseudomallei* and other members of the *Burkholderia* genus such as *Burkholderia*  
95 *ambifaria* (20). The products of the HmqABCDEFG enzymes have varying carbon chain  
96 lengths and saturation, and presence of substitutions on the quinolone ring such as  
97 methylation and oxidation. The relative abundance of these various congeners differs  
98 between species (21). The *hmq* operon is homologous to the *pqs* operon found in *P.*  
99 *aeruginosa* (21, 22). The molecules produced by *Burkholderia* also differ from that of *P.*  
100 *aeruginosa* in that most bear a methyl group at the 3' position and possess an unsaturated  
101 aliphatic side chain, which are linked to the presence of the additional *hmqG* and *hmqF*  
102 genes, respectively (21). The main product of the *P. aeruginosa pqs* operon, 4-hydroxy-  
103 2-heptylquinoline or HHQ is converted to 3,4-dihydroxy-2-heptylquinoline  
104 (*Pseudomonas* Quinolone Signal; PQS) by the enzyme PqsH (23, 24). Both are involved  
105 in quorum sensing in *P. aeruginosa* and are detected by the MvfR regulator (25-27). No  
106 homologs of the *pqsH* and *myfR* genes have been found in *Burkholderia* (21).

107 We are interested in the small molecule repertoire of *B. thailandensis* as an  
108 avenue to better understand its biology and make new discoveries on natural product  
109 biosynthesis. We observed that *B. thailandensis* culture fluid has significant antimicrobial  
110 activity that is not due to bactobolin, the only other known antimicrobial produced in  
111 these conditions. This bactobolin-independent activity was isolated to the *hmq* gene  
112 cluster using an approach involving transposon mutagenesis and screening for mutants  
113 exhibiting reduced antimicrobial activity. Purified and synthetic hydroxy-ialkylquinoline  
114 derivatives were assessed for their antimicrobial properties of several biosynthetic  
115 products of the *hmq* genes, including HMAQ congeners and *N*-oxide derivatives  
116 (HMAQ-NO) with various alkenyl side chain lengths. We also confirmed the  
117 involvement of *hmqL* in the biosynthesis of HMAQ-NO compounds. Our results provide  
118 new information on the biosynthesis and activities of the methylated hydroxy-  
119 alkenylquinolines produced by *Burkholderia*.

120

121

## 122 RESULTS

### 123 *Antimicrobial activity of B. thailandensis bactobolin-null mutants*

124 Initial liquid co-culture experiments with *B. thailandensis* and *B. subtilis* showed  
125 that *B. thailandensis* has a strong growth advantage over *B. subtilis*. The growth  
126 advantage was so substantial that after overnight liquid co-culture with *B. thailandensis*,  
127 *B. subtilis* decreased from a density of  $10^6$  cells per mL to below the limit of detection  
128 ( $<10^2$  cells per mL). This result was not solely attributed to bactobolin, as a bactobolin-  
129 null mutant (BD20) also had the same growth advantage over *B. subtilis* (**Fig. 1A**). This  
130 observation led to the hypothesis that *B. thailandensis* has a previously uncharacterized  
131 antimicrobial activity against *B. subtilis* that is not mediated by bactobolin. To further  
132 explore this hypothesis, culture fluids of several *B. thailandensis* strains were harvested  
133 and tested for antimicrobial activity (**Fig. 1B**). As previously observed (11), filter-  
134 sterilized culture fluids of wild-type *B. thailandensis* saturated to a paper filter disc  
135 placed on a lawn of *B. subtilis* caused a zone of growth inhibition around the filter disc,  
136 whereas there was no growth inhibition observed with the bactobolin-null BD20 strain  
137 (**Fig. 1B**, top panel). However, unprocessed culture fluid of both strains (wild-type and  
138 BD20), which had not gone through the filter sterilization process, demonstrated  
139 antimicrobial activity (**Fig. 1B**, middle and bottom panels). This observation (i.e. that  
140 only unprocessed culture fluid had bactobolin-independent antimicrobial activity) could  
141 be explained by several possible hypotheses: first, that the filter sterilization process  
142 removes or inactivates antimicrobial activity; and second, that antimicrobial activity  
143 requires live cells. In support of the first hypothesis, the antimicrobial activity was  
144 observed in the absence of viable *B. thailandensis* bactobolin mutant cells; unprocessed *B.*  
145 *thailandensis* BD20 culture fluids had activity against *B. subtilis* when added directly to  
146 high-salt LB agar plates, which are conditions that do not allow for *B. thailandensis*  
147 growth (**Figure 1B**, bottom panel). Ethyl acetate extracts of *B. thailandensis* cultures also  
148 had activity against *B. subtilis* (**Fig. S1**). Together, these results suggest *B. thailandensis*  
149 produces an antimicrobial other than bactobolin, which is eliminated by filter sterilization.

150

151 ***Isolation and identification of antimicrobial-deficient transposon mutants***

152 To identify the genes required for the observed antimicrobial activity, we used a  
153 mutagenesis and screening approach. First, we randomly mutagenized the *B.*  
154 *thailandensis* bactobolin-null mutant BD20 with a transposon containing the  
155 trimethoprim resistance gene *dhfR* (Tn5::*dhfR*). Next, we screened the mutants (~10,000)  
156 using a high-throughput method to assess antimicrobial activity (for experiment overview  
157 see **Fig. S2**). Briefly, we added *B. subtilis* cells to cooled molten agar and mixed gently  
158 before pouring into plates. After the media solidified, single isolated colonies (ie,  
159 transposon mutants) were patched onto the plates. The next day, plates were assessed for  
160 zones of inhibition. *B. thailandensis* patches demonstrating reduced zones of inhibition  
161 compared with the *B. thailandensis* bactobolin-defective parent were re-isolated for  
162 further study. We initially identified 60 antimicrobial-defective candidates. Of those, 9  
163 were confirmed to have reduced antimicrobial activity against *B. subtilis* (**Fig. 2A**) with  
164 no observable growth defects (**Table S3**). These were mutants 7, 9, 14, 27, 31, 32, 56, 63,  
165 and 68.

166 To identify the location of the transposon mutations, we performed whole-  
167 genome sequencing using an Illumina platform, followed by PCR amplification and  
168 Sanger sequencing to verify mutations in both the Illumina-sequenced isolates and the  
169 un-sequenced isolates. Of the nine mutants identified in our screen, seven had insertions  
170 in the *hmqABCDEFG* operon (BTH\_II1929 - 1935, **Table 2**). The other two mutants had  
171 disruptions in a previously unstudied gene, BTH\_II1576, which is predicted to encode a  
172 monooxygenase. To verify the *hmq* locus and BTH\_II1576 contribute to the  
173 antimicrobial defects observed for the transposon mutants, we disrupted *hmqA* or  
174 BTH\_II1576 in the bactobolin-defective BD20 strain using homologous recombination.  
175 Both gene disruptions caused a similar defect in *B. subtilis* growth inhibition as observed  
176 with the transposon mutants (**Fig. 2B**), supporting that the *hmq* genes and BTH\_II1576  
177 are important for the bactobolin-independent antimicrobial activity of *B. thailandensis*.

178

179 ***Identification and activities of hmq gene products***

180 Both the *pqs* and *hmq* gene products use anthranilic acid and fatty acid precursors  
181 to generate H(M)AQs through the pathway illustrated in **Fig. 3**. The result of biosynthesis  
182 includes molecules with unsaturated or saturated side chains and *N*-oxide derivatives. The  
183 most abundant HMAQ in *B. thailandensis* E264 cultures is a congener with an  
184 unsaturated C9 side chain, 4-hydroxy-3-methyl-2-nonenylquinoline referred to as HMNQ  
185 or HMAQ-C9:2' (21). To test whether production of HMAQ-C9:2' is absent in our  
186 transposon mutants, we measured this HMAQ in culture fluid using a LC-MS/MS  
187 method to find a product with the expected m/z of 284. Consistent with previous results  
188 (21, 41), transposon mutants with insertions in *hmqA* and *hmqF* had no HMAQ-C9:2'  
189 (<0.05 µg/mL, the limit of detection). We also detected no HMAQ-C9:2' in *hmqC*  
190 mutants, consistent with the proposed role of HmqC in HMAQ biosynthesis (**Fig. 3**). The  
191 BD20 parent strain and BTH\_III1576 transposon mutants both clearly produced this  
192 HMAQ congener (measured at 5-8 µg/mL).

193 We tested the activity of HMAQ-C9:2' directly against *B. subtilis* using a  
194 standard minimum inhibitory concentration (MIC) assay. The MIC of purified HMAQ-  
195 C9:2' against *B. subtilis* was 50 µg/mL (**Table 2**). HMAQ-C9:2' also inhibited  
196 *Staphylococcus aureus* growth (MIC 25 µg/mL). We did not detect any antimicrobial  
197 activity against *Escherichia coli* or *Pseudomonas aeruginosa* (MIC >200 µg/mL HMAQ-  
198 C9). Of note, the concentration of HMAQ-C9:2' in *B. thailandensis* cultures (5-8 µg/mL)  
199 is ~5-fold lower than needed to inhibit *B. subtilis* growth (50 µg/mL), suggesting HMAQ-  
200 C9:2' alone is not sufficient for killing *B. subtilis* in our co-culture experiments. Instead,  
201 we hypothesized that the killing activity involves another product of the *hmq* genes.

202

### 203 ***Biosynthesis and antimicrobial activity of HMAQ-NO***

204 The protein product of BTH\_III1576 shares 52% amino acid sequence identity to that of  
205 the *P. aeruginosa* PqsL protein involved in HAQ biosynthesis. PqsL synthesizes 2-  
206 hydroxylaminobenzoyl-acetate (2-HABA) from 2-aminobenzoylacetate (2-ABA) as a  
207 step in the pathway to make *N*-oxide derivatives (HAQ-NO) (42, 43) (**Fig. 3**, left column).  
208 We hypothesized that BTH\_III1576 is similarly involved in biosynthesis of *N*-oxide  
209 HMAQ (HMAQ-NO) in *B. thailandensis* (**Fig. 3**, right column). To test this hypothesis,



210 we used LC-MS/MS to measure HMAQ-NO in the BTH\_III1576 transposon mutants. We  
211 measured HMAQ-NO with an unsaturated C9 or C7 side chain, which are two abundant  
212 congeners in *B. thailandensis* E264. Both of the BTH\_III1576 mutants and our  
213 constructed BD20 BTH\_III1576 mutant had undetectable HMAQ-NO-C9 (<0.05 µg/mL),  
214 whereas the BD20 parent had detectable levels ( $1.5 \pm 0.5$  µg/mL). We also ectopically  
215 expressed BTH\_III1576 from an IPTG-inducible *lac* promoter from the neutral *glmS1* site  
216 in the engineered BTH\_III1576 mutant genome, and compared HMAQ-NO-C9 and  
217 antimicrobial activities in this strain with an empty *lac*-promoter containing mutant or  
218 BD20 parent (**Fig. 4**). IPTG induction of BTH\_III1576 in the mutant restored production  
219 of HMAQ-NO (**Fig. 4A**) and increased the zone of inhibition of *B. subtilis* in colony  
220 outgrowth experiments (**Fig. 4B**), supporting that BTH\_III1576 is important for each of  
221 these processes. Further, BTH\_III1576 induction significantly decreased HMAQs,  
222 supporting that the product of BTH\_III1576 uses HMAQ as the substrate to generate  
223 HMAQ-NO. Together, our results confirm that the BTH\_III1576 product is analogous to  
224 PqsL in HAQ-NO biosynthesis and is appropriately named *hmqL*, as previously proposed  
225 (22).

226 Because HmqL generates HMAQ-NO and is important for antimicrobial activity  
227 observed in *B. thailandensis* cultures, we tested the hypothesis that HMAQ-NO has  
228 antimicrobial activity against *B. subtilis*. We assessed the sensitivity of *B. subtilis* to the  
229 most abundant HMAQ-NO produced by *B. thailandensis* (21), synthetic HMAQ-NO-  
230 C9:2' (28). The MIC of HMAQ-NO-C9:2' was 0.75 µg/mL against *B. subtilis*. This MIC  
231 is below the measured concentration of HMAQ-NO-C9:2' in *B. thailandensis* cell  
232 cultures ( $1.5 \pm 0.5$  µg/mL), supporting the idea that HMAQ-NO are primarily responsible  
233 for the observed antimicrobial activity against *B. subtilis* in co-cultures with *B.*  
234 *thailandensis*. Interestingly, there was no difference in activity of HMAQ-NO and  
235 HMAQ against *S. aureus* (MIC 25 µg/mL). Differences in diffusion or target site  
236 availability could explain the differences in relative activities of these two molecules in  
237 each species.

238

239 **Antimicrobial activities of structurally-related hydroxy-alkylquinolines**

240 We found it intriguing that HHQ and HQNO were much less active against *B. subtilis*  
241 than the respective HMAQ and HMAQ-NO molecules (**Table 2**). The difference in  
242 activity could be due to the difference in alkyl chain lengths or saturation level.  
243 Alternatively, the presence of the methyl group in HMAQs could also affect the activity.  
244 To address the first possibility, we tested synthetic HMAQ-NO congeners with a C7 and  
245 C8 unsaturated alkyl side chain against *B. subtilis*. Our results showed that the C8 and C7  
246 HMAQ-NO molecules were 2- and 8-fold more active against *B. subtilis* than the C9  
247 congener (**Table 2**). These results suggest the longer carbon chain length has higher  
248 activity of HMAQ-NO against *B. subtilis*. The C7 HMAQ-NO was also more active than  
249 HQNO (HAQ-NO-C7) by about 2-fold against *S. aureus* and 4-fold against *B. subtilis*  
250 (**Table 2**). HQNO differs from C7 HMAQ-NO in that it is unmethylated and has a  
251 saturated side chain. Thus, either methylation or saturation of the side chain also play a  
252 role in activity.

253

#### 254 *HMAQ-NO promotes competition in liquid co-cultures*

255 Results of our transposon mutant analysis suggest *hmqL* and HMAQ-NO-C9 are  
256 important for the initial observation that *B. thailandensis* eliminates *B. subtilis* from  
257 liquid co-cultures. To test this hypothesis, we competed *B. subtilis* with *B. thailandensis*  
258 bactobolin-deficient BD20 containing either a single *hmqA* or *hmqL* mutation or a *hmqA*-  
259 *hmqL* mutation in liquid co-culture experiments. Singly disrupting *hmqA* or *hmqL* nearly  
260 abolished the ability of *B. thailandensis* to kill *B. subtilis* (**Fig. 5A**). Further, a strain  
261 disrupted for both *hmqL* and *hmqA* showed killing defects similar to that of either single  
262 mutant, supporting that *hmqL* and *hmqA* are in the same biosynthetic pathway. The  
263 results also support that the HMAQ-NO molecules, or HMAQ-NO together with other  
264 products of this pathway, are key for killing in liquid co-cultures.

265 Our initial observations suggested the antimicrobial in *B. thailandensis* cultures  
266 was sensitive to filtration, thus, we also sought to test the sensitivities of HMAQ and  
267 HMAQ-NO to filtration. We measured concentrations of each of these molecules in  
268 unfiltered and filtered fluid from cell-free *B. thailandensis* cultures. We also determined  
269 the concentrations of these molecules in pelleted cells to determine whether they are

270 primarily associated with the cell, similar to HAQs in *P. aeruginosa* (26, 44). We found  
271 that the percent HMAQs and HMAQ-NOs in the cell fraction was  $91 \pm 2$  and  $71 \pm 3$ ,  
272 respectively. Thus, these molecules are highly cell-associated. Furthermore, filtration  
273 further depletes molecules remaining in culture fluid to nearly undetectable levels (**Fig.**  
274 **5B**). These results are consistent with the idea that HMAQs and HMAQ-NOs are  
275 removed by separation of the cells and filtration of the remaining fluid, providing an  
276 explanation as to how the activity of these molecules have been missed in prior  
277 experiments.

278

### 279 *HMAQ biosynthesis in B. ambifaria*

280 The *Burkholderia ambifaria* genome encodes an *hmq* operon homologous to that  
281 of *Burkholderia thailandensis* (21), however, *B. ambifaria* does not produce HMAQ-NOs  
282 (21), presumably because it does not have a homolog of *hmqL/pqsL*. We predicted that  
283 introducing the *B. thailandensis hmqL* to *B. ambifaria* would enable production of  
284 HMAQ-NO. To test this prediction, we introduced the *hmqL* gene to *B. ambifaria* on  
285 plasmid pME6010 (36). Because HMAQ biosynthesis is less well characterized in this  
286 species, we used combined measurements of all three C7, C8 and C9 congeners of  
287 HMAQs for our analysis. We observed that *B. ambifaria* (pME6010) had no detectable  
288 HMAQ-NO, as previously reported (21). However, *B. ambifaria* with pME6010-*hmqL*  
289 produced measurable levels of HMAQ-NO (**Fig. 6A**), which is consistent with the idea  
290 that HmqL is the only missing enzyme permitting the production of HMAQ-NO  
291 production in *B. ambifaria*. This strain also had 100-fold less HMAQ than the empty  
292 plasmid-only strain (**Fig. 6A**), suggesting strong competition for the HMAQ precursor,  
293 likely 2-aminobenzoyl(methyl)acetate (43) (the product of HmqADEG) (Fig 3). We also  
294 tested whether the expression of HmqL caused *B. ambifaria* to inhibit *B. subtilis* growth.  
295 We spotted unfiltered culture fluid from *B. ambifaria* with pME6010 or pME6010-*hmqL*  
296 onto a lawn of *B. subtilis*. Only cultures of the strain expressing *hmqL* could inhibit *B.*  
297 *subtilis* growth (**Fig. 6B**). Together, the results provide further support that HmqL is  
298 crucial for production of the HMAQ-NO antimicrobials.

299

300

## 301 DISCUSSION & CONCLUSIONS

302 The antimicrobial properties of HAQs date back to 1945, when an “antibiotic  
303 metabolite” was described in *P. aeruginosa* (45). Although the biosynthesis steps and  
304 biology of the HAQs in *P. aeruginosa* have since been studied in detail, much less is  
305 known of those in *B. thailandensis* (21, 28, 46). Results of this study add new  
306 information to the known steps of biosynthesis of *B. thailandensis* HMAQs. Previous  
307 studies showed that enzymes analogous to PqsA-D in *P. aeruginosa* are involved in the  
308 synthesis of *B. thailandensis* HMAQ from anthranilate (**Fig. 3**, right side). In *P.*  
309 *aeruginosa* the enzyme PqsL catalyzes an essential step in the synthesis of HAQ N-  
310 oxides (42, 43). *B. thailandensis* has no PqsH enzyme homologue and does not make 3-  
311 hydroxylated HAQs; a methyl is instead present as a substitution at that position. *B.*  
312 *thailandensis* is also missing a homologue of the HHQ/PQS receptor gene, *myfR*. Our  
313 study validates the involvement on HmqL in N-oxide HMAQs biosynthesis and shows  
314 how the HMAQ family of molecules contribute to the arsenal of compounds used by *B.*  
315 *thailandensis* to compete with other species. The findings also provide new insight into  
316 the activities of specific *B. thailandensis* HMAQ family congeners against other bacteria.

317 Like many toxins, H(M)AQs have several known functions. In *P. aeruginosa*,  
318 where these molecules are best studied, the N-oxide congeners are potent antimicrobials  
319 that inhibit Gram-positive bacteria (24, 47, 48) and several of the HAQs are important for  
320 interspecies competition (49-51). Our results support that the N-oxide HMAQs join the  
321 arsenal of antimicrobial compounds produced by *B. thailandensis* that promote its ability  
322 to inhibit growth of other species. Other *B. thailandensis* antimicrobials include  
323 bactobolin (12), malleilactone (14, 15), and thailandenes (18). This suite of diverse  
324 antimicrobials might be important for surviving competition with other microbes when  
325 space or other resources become limited. The loss of the *hmq* biosynthesis genes from the  
326 genome of the closely related host-adapted pathogen *B. mallei* supports a role of these  
327 genes in the saprophytic lifestyle of *B. thailandensis*. The current study demonstrates the  
328 N-oxide HMAQs are important for killing other species in several laboratory co-culture  
329 conditions, similar to *P. aeruginosa* HQNO. HQNO also has other known effects such as  
330 enhancing biofilm formation (52, 53) or increasing resistance to antimicrobials (54, 55)  
331 and it remains to be seen if HMAQ-NO is similar in these other ways.

332 A particularly interesting discovery in this work was that *B. thailandensis*  
333 HMAQ-NO C9:2' is much more active (33-fold) than *P. aeruginosa* HQNO (HAQ-NO  
334 C7) against *B. subtilis* (Table 2). Thus the *B. thailandensis* HMAQ-NO has a particularly  
335 lethal structure compared with the related *P. aeruginosa* HQNO molecule. Results with  
336 synthetic HMAQ-NO molecules with shorter acyl side chains indicate the heightened  
337 activity is due to both side chain length and possibly methylation (or saturation). It  
338 remains to be seen whether the structural moieties important for this lethality alter the  
339 target site of this molecule, or the ability to penetrate *B. subtilis* cells, or some other  
340 aspect of this molecule. In addition to the *N*-oxide congeners, *B. thailandensis* produces a  
341 variety of HMAQs with side chains of varying length and saturation (21, 26). Although  
342 these other molecules had less potent antimicrobial activities (**Table 2**), it is possible they  
343 contribute to competition in other ways. A previous study showed that different species  
344 of HAQs used in combination can have synergistic antimicrobial effects on other bacteria,  
345 by acting on distinctly different cellular targets (56). Thus, the diversity of H(M)AQs  
346 produced by *B. thailandensis* might serve to enhance killing during competition or could  
347 be important for averting development of antibiotic resistance in competitors.

348 We find it interesting that the *Burkholderias* do not have the enzyme responsible  
349 for generating PQS (PqsH, see **Fig. 3**). PQS has a variety of known functions such as  
350 immune modulation (57), cell density-dependent gene regulation (24, 58) and iron  
351 sequestration (26). *B. thailandensis* might have lost the ability to synthesize PQS because  
352 these functions are not needed, or because there is existing functional redundancy with  
353 other molecules or pathways. For example, the small-molecule malleilactone might have  
354 similar biophysical properties and also sequester iron (14). It is also interesting that *B.*  
355 *ambifaria* lacks the HmqL enzyme responsible for generating *N*-oxide HMAQs, which  
356 are the most antimicrobial members of this family. The lack of PQS or any *N*-oxide  
357 analog in *B. ambifaria* strongly supports that other products of this pathway have  
358 important functions that contribute to the survival of this species, although the biology of  
359 the other products of the Hmq system are not well understood.

360

## 361 MATERIALS AND METHODS

362 **Bacterial culture conditions and reagents.** Bacteria were grown in Lysogeny broth  
363 (LB) (10 g tryptone, 5 g yeast extract, and 5 g NaCl per liter) supplemented with 50 mM  
364 morpholinepropanesulfonic acid (MOPS) where indicated, in M9 minimal medium  
365 supplemented with 0.4% D-glucose and 10 mM *para*-chloro-phenylalanine (*p*-Cl-Phe;  
366 Sigma) for *B. thailandensis* counterselection during mutant construction, or using DM  
367 media (0.25X M63 salts, 1 mM MgSO<sub>4</sub>, 0.4% glycerol, 0.2% glucose, 1 µg/mL thiamine,  
368 and 40 µg/mL each of leucine, isoleucine, valine, tryptophan, glutamic acid, and  
369 glutamine) for transformation of PCR-generated products. For liquid co-cultures, *B.*  
370 *subtilis* and *B. thailandensis* growth was at 37 °C. For all other experiments *B.*  
371 *thailandensis* growth was at 30 °C and all *E. coli* and *B. ambifaria* growth was at 37 °C.  
372 4-Hydroxy-2-heptylquinoline (HHQ) was purchased from Sigma (cat. SML0747). 4-  
373 Hydroxy-2-heptylquinoline *N*-oxide (HQNO) was purchased from Cayman chemicals  
374 (cat. 15159). 4-Hydroxy-3-methyl-2-nonylquinoline (HMNQ) was purified from *B.*  
375 *thailandensis* E264 cultures as described previously (21). The other hydroxy-  
376 alkenylquinolines were synthesized as described below. For selection, trimethoprim was  
377 used at 100 µg/mL, gentamicin was used at 100 µg/mL, kanamycin was used at 500  
378 µg/mL (*B. thailandensis*) or 50 µg/mL (*E. coli*), tetracycline was used at 225 µg/mL (*B.*  
379 *ambifaria*), and NaCl was used at 5% (for inhibiting *B. thailandensis* in co-culture  
380 enumerations). Isopropyl β-D -1-thiogalactopyranoside (IPTG) was added at 1 mM final  
381 concentration to cultures and plates, when appropriate. Genomic DNA, PCR and DNA  
382 fragments, and plasmid DNA were purified using a Puregene Core A kit, plasmid  
383 purification miniprep kit, or PCR cleanup/gel extraction kits (Qiagen or IBI-MidSci)  
384 according to the manufacturer's protocol.

385

386 **Synthesis of *N*-oxides of hydroxy-alkenylquinolines.** HMAQNOs were synthesized as  
387 previously described (28) from corresponding HMAQs in which the quinolone scaffold  
388 was built *via* the Conrad-Limpach approach (29). Briefly, aniline was condensed with  
389 diethyl 2-methyl-3-oxosuccinate and the resulting diester was cyclized under acidic  
390 conditions. Reduction of the quinolone ester followed by halogen substitution led to 2-  
391 chloromethyl-3-methylquinolin-4(1*H*)-ones, which were subjected to Suzuki-Miyaura  
392 cross-coupling (30) with commercially available alkenylboronic acid pinacol esters to

393 provide HMAQs. Then, they were converted into corresponding ethyl carbonates,  
394 oxidized with *m*CPBA, and deprotected to yield HMAQNOs (31). The structure of  
395 HMAQ-NOs were confirmed by HRMS as well as 1D and 2D NMR analysis.

396

397 **Genetic manipulations.** All bacterial strains, plasmids, and primers used in this study are  
398 listed in Tables S1-S2. We used wild type and mutant derivatives of *B. thailandensis*  
399 strain E264 (5). We used *B. ambifaria* strain HSJ1 (21), and *E. coli* strain DH5 $\alpha$  for  
400 genetic manipulations (Invitrogen). The *B. thailandensis* bactobolin-defective mutant  
401 BD20 has a deletion of the bactobolin biosynthesis gene *btaK* as described previously  
402 (11). The *B. thailandensis* *hmqA* mutant was constructed using allelic exchange using  
403 methods described previously (6) and plasmid pMCG19. pMCG19 was constructed by  
404 first amplifying *hmqA* from the *B. thailandensis* E264 genome using primers *hmqA*for  
405 and *hmqA*rev containing HindIII and KpnI cleavage sites, respectively. The PCR product  
406 was digested with HindIII and KpnI and ligated to HindIII-KpnI-cut pEX18Tp-PheS (9).  
407 The chloramphenicol resistance cassette was amplified from pACYC184 (32) using  
408 primers CmFPstI and CmRPstI each containing the PstI cleavage site and ligated to the  
409 PstI site inside the *hmqA* gene in pEX18Tp-PheS-*hmqA* to make pMCG19.

410 *B. thailandensis* BTH\_II1576 (*hmqL*) mutants were made by transforming a PCR-  
411 amplified BTH\_II1576::*dhfr* allele from transposon mutant #56 into the genome of strain  
412 BD20 using PCR transformation using a modified protocol similar to Thongdee *et al.*  
413 (33). Briefly, shaking *B. thailandensis* cultures were grown at 37°C to an optical density  
414 at 600 nm (OD<sub>600</sub>) of 0.5, concentrated 20-fold, and distributed to five aliquots of 50  $\mu$ L.  
415 Each aliquot was mixed with 5  $\mu$ L of gel-extracted *hmqL*::*dhfr* PCR product (amplified  
416 using *hmqL*-Tn-for2 and *hmqL*-Tn-rev2 primers). The cell-DNA mixture was spotted  
417 onto solid DM media (DM liquid media with 1.5% agar) and incubated at 37 °C for 48 h.  
418 The DM plate growth was scraped up and collected, washed twice with DM, suspended  
419 in 200  $\mu$ L DM, and spread onto LB agar containing trimethoprim. Mutant strains were  
420 verified by PCR-amplifying the mutated region and sequencing the PCR product.

421 For ectopic expression of *hmqL* in *B. thailandensis*, this gene was placed under  
422 control of the IPTG-inducible *lac* promoter in pUC18miniTn7T-LAC-Km (34). To  
423 construct this plasmid, we amplified *hmqL* from the *B. thailandensis* E264 genome using

424 primers hmqL-ORF-F-SacI and hmqL-ORF-R-HindIII that incorporated the SacI and  
425 HindIII restriction enzyme sites, respectively, into the product. The amplicon was cut  
426 with SacI and HindIII and ligated to SacI- and HindIII-digested pUC18miniTn7T-Kan-  
427 *Plac-malR* (34) to make pUC18miniTn7T-*Plac-hmqL* (entirely removing the *malR* gene).  
428 This plasmid was used to transform competent *B. thailandensis* with the helper plasmid  
429 pTNS2 as described previously (35). We used PCR to verify insertion of the *Plac-hmqL*  
430 cassette into the *atn7* site near *glmS1*.

431 We used plasmid pME6010 (36) for expressing the *hmqL* gene from *B.*  
432 *thailandensis* in *B. ambifaria*. The *hmqL* gene was amplified from the *B. thailandensis*  
433 E264 genome using primers hmqL-F and hmqL-R that incorporated the BglII and KpnI  
434 sites into the amplicon. The product was cut with BglII and KpnI and ligated to BglII-  
435 and KpnI-digested pME6010 to make pMCG17. *B. ambifaria* strains with pME6010  
436 plasmids were constructed by electroporation as previously described for *B. thailandensis*  
437 (6).

438

439 **Liquid co-cultures.** Logarithmic-phase overnight starter cultures (OD<sub>600</sub> between 0.5 and  
440 1.5) of *B. subtilis* and *B. thailandensis* were diluted to an OD<sub>600</sub> of 0.05 and combined at  
441 a starting ratio of 1:1 in a 10 mL volume of LB in 125 mL baffled flasks. The flasks were  
442 incubated with shaking at 250 rpm at 37 °C for 24 h before serially diluting and plating  
443 on LB agar plates containing gentamicin (to inhibit *B. subtilis*) or 5% NaCl (to inhibit *B.*  
444 *thailandensis*) and IPTG as appropriate to enumerate bacterial colony forming units  
445 (CFU).

446

447 **Antimicrobial activity assays.** Antimicrobial activities of *B. thailandensis* culture fluid  
448 were assayed using disc diffusion (for filtered fluid) or outgrowth diffusion (for  
449 unclarified fluid) methods. For both methods, inocula for each of the *B. thailandensis*  
450 strains and *B. subtilis* were prepared by suspending a colony from an LB agar plate into  
451 LB broth and growing overnight at 30 °C with shaking. *B. subtilis* overnight culture (100  
452 µL) diluted 1:100 was spread onto an LB agar plate and allowed to dry. A filter disc was  
453 placed on the *B. subtilis* lawn and saturated with *B. thailandensis* cultures that were either  
454 centrifuged and filter sterilized through a 0.2 µm membrane (for disc diffusion) or



455 spotted directly onto the *B. subtilis* lawns (for outgrowth diffusion). The plates were  
456 incubated at 30 °C for 24 h before observing zones of clearing of the *B. subtilis* lawns.  
457 The outgrowth assays were also conducted similarly on LB agar plates containing 5%  
458 NaCl, which inhibits growth of the *B. thailandensis* strains.

459 The antimicrobial activities of purified, commercial, or synthesized hydroxy-  
460 alkylquinoline compounds were assessed using a minimum inhibitory concentration  
461 (MIC) assay according to a modified protocol from the 2018 guidelines of the Clinical  
462 and Laboratory Standards Institute (CLSI). Inocula for each test organism were prepared  
463 by suspending a colony from an LB agar plate into Tryptic Soy Broth (TSB) and growing  
464 for 3-5 h at 37 °C with shaking, then adjusting the culture turbidity in TSB to an OD<sub>600</sub> of  
465 0.25, roughly the equivalent of a 1.0 McFarland Standard ( $3 \times 10^8$  CFU per mL). These  
466 cell suspensions were used as inocula for microtiter MIC assays. An 2.5 µL inoculum,  
467 which corresponded to  $1 \times 10^6$  cells, was added to a 100 µL well containing diluted in  
468 cation-adjusted Mueller-Hinton II broth, and these were incubated with shaking for 24 h  
469 at 37 °C. The MIC was defined as the lowest concentration of compound (µg/mL) in  
470 which bacterial growth in the well was not visible.

471

472 **Transposon mutagenesis and screen.** Transposon mutagenesis was performed using the  
473 EZ-Tn5™ <DHFR-1>Tnp Transposome™ Kit (Epicentre), according to manufacturer's  
474 specifications. Briefly, electrocompetent cells of the *B. thailandensis* bactobolin-  
475 defective mutant BD20 were generated by growing cultures to mid-exponential phase  
476 (OD<sub>600</sub> = 0.5-0.7), collecting with centrifugation, washing the cell pellet three times in  
477 ice-cold 0.5 M sucrose (using 25% the volume of the original culture), and then  
478 resuspending the cell pellet in 100 µL ice-cold 0.5 M sucrose. Immediately, 1 µL  
479 transposome was added to 50 µL electrocompetent cells in a 0.2 mm electroporation  
480 cuvette. This was electroporated with the Bio-Rad Gene Pulser II (settings 25 µF, 200 Ω,  
481 2.5 kV), and the cells were immediately recovered in 1 mL LB broth with shaking at 37  
482 °C for 1 h. At the end of the recovery, the culture was diluted 1:25, and 100 µL samples  
483 were plated on 20 LB plates with trimethoprim selection (100 µg/mL). The plates were  
484 incubated overnight at 37°C. The following day, single colonies were patched onto plates  
485 prepared with *B. subtilis* to screen for antimicrobial activity. Due to the scale required for

486 the screen, we added *B. subtilis* directly to molten agar used to pour plates, as opposed to  
487 spreading *B. subtilis* lawns after pouring. To prepare the *B. subtilis*-agar media, we added  
488 1.43 mL of a stationary phase *B. subtilis* culture (overnight growth) to 1 L of cooled but  
489 molten LB agar media (55-60 °C), mixed gently and poured. After a brief period to  
490 solidify and dry, plates were used to patch colonies isolated from the EZ-Tn5™ <DHFR-  
491 1> transposon mutagenesis. Patched plates were incubated overnight at 30 °C prior to  
492 identifying mutants defective for antimicrobial activity, as determined by reduced zones  
493 of *B. subtilis* growth inhibition compared with the *B. thailandensis* parent. Identified  
494 candidates were streaked for single *B. thailandensis* colonies on LB with gentamicin to  
495 prevent *B. subtilis* growth, and re-tested in our assay to confirm the phenotype.  
496 Confirmed mutants with no apparent growth defects were subjected to whole genome  
497 sequencing.

498

499 **Identification of transposon insertion sites.** The transposon insertion locations of five  
500 transposon mutants (#7, 14, 31, 32, and 56) were determined by whole-genome re-  
501 sequencing. DNA isolated from the transposon mutant strains was used to make  
502 sequencing libraries with 300-bp inserts. The libraries were sequenced on an Illumina  
503 MiSeq System using the NEBNext Ultra II kit, generating approximately one million  
504 200-bp paired-end reads per sample. The paired-end reads were assembled *de novo* into  
505 draft genomes using the SPAdes assembler with standard settings (37). For each *de novo*  
506 assembly, the contig with Tn5 transposon sequence was located using a nucleotide search  
507 in the BLAST+ command line suite with individual blast databases for each transposon  
508 mutant (38). Clustal Omega was then used to precisely locate the sequence context of  
509 Tn5 insertion in each contig of interest (39). Genomic context for individual transposon  
510 insertions was then determined by blasting up- and down-stream sequences against a  
511 database of all *B. thailandensis* E264 gene sequences to identify specific loci interrupted  
512 by Tn5 insertion. Finally, the raw reads were aligned to the *B. thailandensis* E264  
513 ATCC700388 reference genome (NC\_007650, NC\_007651 downloaded  
514 from [burkholderia.com](http://burkholderia.com)) using Strand NGS (Bangalore, India) software v 3.1.1 to confirm  
515 the insertion locus in each mutant. The remaining four transposon mutants (#9, 27 63,  
516 and 68) were assessed by PCR amplifying regions of the *hmq* locus (primers given in

517 **Table S2).** Mutations identified by either method were verified by Sanger sequencing of  
518 PCR-amplified products.

519

520 **HMAQ and HMAQ-NO measurements from bacterial cultures.** To measure the  
521 production of HMAQ and HMAQ-NO in *B. thailandensis* cultures, samples were  
522 prepared by diluting stationary-phase *B. thailandensis* cultures to an OD<sub>600</sub> of 0.05 into 5  
523 mL of LB in 18 mm culture tubes and growing the cultures for 18 h with shaking at 250  
524 rpm at 30°C or as otherwise described. Where necessary, 1 mM IPTG was added to the  
525 LB at the beginning of the growth experiment. At 18 h, sample preparation and liquid  
526 chromatography-tandem mass spectrometry (LC-MS/MS) analyses were performed as  
527 described by Lépine *et al.* (40), with minor modifications. Briefly, for each sample, 300  
528 µL of grown culture was mixed with 300 µL of HPLC-grade methanol containing 4 ppm  
529 of 5,6,7,8-tetradeutero-4-hydroxy-2-heptylquinoline (HHQ-d<sub>4</sub>) as an internal standard,  
530 vortexed and centrifuged for 5 min at maximum speed in a microfuge. The  
531 supernatant/methanol solution was carefully recovered for analysis. Samples were  
532 analyzed by high-performance liquid chromatograph (HPLC; Waters 2795, Mississauga,  
533 ON, Canada) equipped with a C8 reverse-phase column (Eclipse XDB-C8, Agilent  
534 Technologies, Mississauga, ON, Canada), and the detector was a tandem quadrupole  
535 mass spectrometer (Quattro Premier XE, Waters). Analyses were carried out in the  
536 positive electrospray ionization (ESI+) mode.

537

## 538 **ACKNOWLEDGEMENTS**

539 This work was supported by the NIH through grant R35GM133572 and a pilot award  
540 from the COBRE Chemical Biology of Infectious Disease Program (P20 GM113117) to  
541 J.R.C. and R01 GM125714 to A.A.D. N.A.E. was supported by a K-INBRE fellowship  
542 (P20 GM103418) and a KU Undergraduate Research Award. The KU sequencing facility  
543 is supported by P20 GM103418 and P20 GM103638. K.L.A. was supported by award  
544 ASFAHL19F0 from the Cystic Fibrosis Foundation. C.G. was supported by a Discovery

545 grant from the Natural Sciences and Engineering Research Council of Canada (NSERC)  
546 under award number RGPIN-2016-04950 and E.D. was supported by a grant from the  
547 Canadian Institutes of Health Research (CIHR) under award number MOP-142466. C. G.  
548 holds a Fonds de recherche du Québec – Santé (FRQS) Research Scholars Junior 2  
549 Career Award. E. D. holds the Canada Research Chair in Sociomicrobiology.  
550

551 **REFERENCES**

- 552 1. Cheng AC, Currie BJ. 2005. Melioidosis: epidemiology, pathophysiology, and  
553 management. *Clin Microbiol Rev* 18:383-416.
- 554 2. Whitlock GC, Estes DM, Torres AG. 2007. Glanders: off to the races with  
555 *Burkholderia mallei*. *FEMS Microbiol Lett* 277:115-22.
- 556 3. Dance DA. 2000. Ecology of *Burkholderia pseudomallei* and the interactions  
557 between environmental *Burkholderia* spp. and human-animal hosts. *Acta Trop*  
558 74:159-68.
- 559 4. Van Zandt KE, Greer MT, Gelhaus HC. 2013. Glanders: an overview of infection  
560 in humans. *Orphanet J Rare Dis* 8:131.
- 561 5. Brett PJ, DeShazer D, Woods DE. 1998. *Burkholderia thailandensis* sp. nov., a  
562 *Burkholderia pseudomallei*-like species. *Int J Syst Bacteriol* 48 Pt 1:317-20.
- 563 6. Chandler JR, Duerkop BA, Hinz A, West TE, Herman JP, Churchill ME, Skerrett  
564 SJ, Greenberg EP. 2009. Mutational analysis of *Burkholderia thailandensis*  
565 quorum sensing and self-aggregation. *J Bacteriol* 191:5901-9.
- 566 7. Choi KH, DeShazer D, Schweizer HP. 2006. mini-Tn7 insertion in bacteria with  
567 multiple *glmS*-linked *attTn7* sites: example *Burkholderia mallei* ATCC 23344.  
568 *Nat Protoc* 1:162-9.
- 569 8. Lopez CM, Rholl DA, Trunck LA, Schweizer HP. 2009. Versatile dual-  
570 technology system for markerless allele replacement in *Burkholderia*  
571 *pseudomallei*. *Appl Environ Microbiol* 75:6496-503.
- 572 9. Barrett AR, Kang Y, Inamasu KS, Son MS, Vukovich JM, Hoang TT. 2008.  
573 Genetic tools for allelic replacement in *Burkholderia* species. *Appl Environ*  
574 *Microbiol* 74:4498-508.
- 575 10. Lawrenz MB, Fodah RA, Gutierrez MG, Warawa J. 2014. Intubation-mediated  
576 intratracheal (IMIT) instillation: a noninvasive, lung-specific delivery system. *J*  
577 *Vis Exp* doi:10.3791/52261:e52261.
- 578 11. Duerkop BA, Varga J, Chandler JR, Peterson SB, Herman JP, Churchill ME,  
579 Parsek MR, Nierman WC, Greenberg EP. 2009. Quorum-sensing control of  
580 antibiotic synthesis in *Burkholderia thailandensis*. *J Bacteriol* 191:3909-18.
- 581 12. Seyedsayamdost MR, Chandler JR, Blodgett JA, Lima PS, Duerkop BA, Oinuma  
582 K, Greenberg EP, Clardy J. 2010. Quorum-sensing-regulated bactobolin  
583 production by *Burkholderia thailandensis* E264. *Org Lett* 12:716-9.
- 584 13. Amunts A, Fiedorczuk K, Truong TT, Chandler J, Peter Greenberg E,  
585 Ramakrishnan V. 2015. Bactobolin A binds to a site on the 70S ribosome distinct  
586 from previously seen antibiotics. *J Mol Biol* 427:753-5.

- 587 14. Biggins JB, Ternei MA, Brady SF. 2012. Malleilactone, a polyketide synthase-  
588 derived virulence factor encoded by the cryptic secondary metabolome of  
589 *Burkholderia pseudomallei* group pathogens. *J Am Chem Soc* 134:13192-5.
- 590 15. Franke J, Ishida K, Hertweck C. 2012. Genomics-driven discovery of  
591 burkholderic acid, a noncanonical, cryptic polyketide from human pathogenic  
592 *Burkholderia* species. *Angew Chem Int Ed Engl* 51:11611-5.
- 593 16. Trottmann F, Franke J, Richter I, Ishida K, Cyrules M, Dahse HM, Regestein L,  
594 Hertweck C. 2019. Cyclopropanol warhead in malleicyprol confers virulence of  
595 human- and animal-pathogenic *Burkholderia* species. *Angew Chem Int Ed Engl*  
596 58:14129-14133.
- 597 17. Moule MG, Spink N, Willcocks S, Lim J, Guerra-Assuncao JA, Cia F, Champion  
598 OL, Senior NJ, Atkins HS, Clark T, Bancroft GJ, Cuccui J, Wren BW. 2015.  
599 Characterization of new virulence factors involved in the intracellular growth and  
600 survival of *Burkholderia pseudomallei*. *Infect Immun* 84:701-10.
- 601 18. Park JD, Moon K, Miller C, Rose J, Xu F, Ebmeier CC, Jacobsen JR, Mao D, Old  
602 WM, DeShazer D, Seyedsayamdost MR. 2020. Thailandenes, cryptic polyene  
603 natural products isolated from *Burkholderia thailandensis* using phenotype-  
604 guided transposon mutagenesis. *ACS Chem Biol*  
605 doi:10.1021/acscchembio.9b00883.
- 606 19. Seyedsayamdost MR. 2014. High-throughput platform for the discovery of  
607 elicitors of silent bacterial gene clusters. *Proc Natl Acad Sci U S A* 111:7266-71.
- 608 20. Coulon PML, Groleau MC, Déziel E. 2019. Potential of the *Burkholderia cepacia*  
609 complex to produce 4-hydroxy-3-methyl-2-alkylquinolines. *Front Cell Infect*  
610 *Microbiol* 9:33.
- 611 21. Vial L, Lépine F, Milot S, Groleau MC, Dekimpe V, Woods DE, Déziel E. 2008.  
612 *Burkholderia pseudomallei*, *B. thailandensis*, and *B. ambifaria* produce 4-  
613 hydroxy-2-alkylquinoline analogues with a methyl group at the 3 position that is  
614 required for quorum-sensing regulation. *J Bacteriol* 190:5339-52.
- 615 22. Diggle SP, Winzer K, Chhabra SR, Worrall KE, Camara M, Williams P. 2003.  
616 The *Pseudomonas aeruginosa* quinolone signal molecule overcomes the cell  
617 density-dependency of the quorum sensing hierarchy, regulates rhl-dependent  
618 genes at the onset of stationary phase and can be produced in the absence of LasR.  
619 *Mol Microbiol* 50:29-43.
- 620 23. Gallagher LA, McKnight SL, Kuznetsova MS, Pesci EC, Manoil C. 2002.  
621 Functions required for extracellular quinolone signaling by *Pseudomonas*  
622 *aeruginosa*. *J Bacteriol* 184:6472-80.
- 623 24. Déziel E, Lépine F, Milot S, He J, Mindrinos MN, Tompkins RG, Rahme LG.  
624 2004. Analysis of *Pseudomonas aeruginosa* 4-hydroxy-2-alkylquinolines (HAQs)  
625 reveals a role for 4-hydroxy-2-heptylquinoline in cell-to-cell communication.  
626 *Proc Natl Acad Sci U S A* 101:1339-44.

- 627 25. Pesci EC, Milbank JB, Pearson JP, McKnight S, Kende AS, Greenberg EP,  
628 Iglewski BH. 1999. Quinolone signaling in the cell-to-cell communication system  
629 of *Pseudomonas aeruginosa*. Proc Natl Acad Sci U S A 96:11229-34.
- 630 26. Diggle SP, Matthijs S, Wright VJ, Fletcher MP, Chhabra SR, Lamont IL, Kong X,  
631 Hider RC, Cornelis P, Camara M, Williams P. 2007. The *Pseudomonas*  
632 *aeruginosa* 4-quinolone signal molecules HHQ and PQS play multifunctional  
633 roles in quorum sensing and iron entrapment. Chem Biol 14:87-96.
- 634 27. Xiao G, Déziel E, He J, Lépine F, Lesic B, Castonguay MH, Milot S, Tampakaki  
635 AP, Stachel SE, Rahme LG. 2006. MvfR, a key *Pseudomonas aeruginosa*  
636 pathogenicity LTTR-class regulatory protein, has dual ligands. Mol Microbiol  
637 62:1689-99.
- 638 28. Piochon M, Coulon PML, Caulet A, Groleau M-C, Déziel E, Gauthier C. 2020.  
639 Synthesis and antimicrobial activity of *Burkholderia*-related 4-hydroxy-3-methyl-  
640 2-alkenylquinolones (HMAQs) and their *N*-oxide counterparts  
641 doi:10.26434/chemrxiv.11859144.v1.
- 642 29. Conrad M, Limpach L. 1887. “Syntheses of quinoline derivatives using  
643 acetoacetic ester”. Reports of the German Chemical Society 20:944-948.
- 644 30. Salvaggio F, Hodgkinson JT, Carro L, Geddis SM, Galloway WRJD, Welch M,  
645 Spring DR. 2016. The synthesis of quinolone natural products from  
646 *Pseudonocardia* sp. European Journal of Organic Chemistry 2016:434-437.
- 647 31. Woschek A, Mahout M, Mereiter K, Hammerschmidt F. 2007. Synthesis of 2-  
648 Heptyl-1-hydroxy-4(1H)-quinolone - Unexpected Rearrangement of 4-  
649 (Alkoxy-carbonyloxy)quinoline N-Oxides to 1-(Alkoxy-carbonyloxy)-4(1H)-  
650 quinolones. Synthesis 2007:1517-1522.
- 651 32. Chang AC, Cohen SN. 1978. Construction and characterization of amplifiable  
652 multicopy DNA cloning vehicles derived from the P15A cryptic miniplasmid. J  
653 Bacteriol 134:1141-56.
- 654 33. Thongdee M, Gallagher LA, Schell M, Dharakul T, Songsivilai S, Manoil C. 2008.  
655 Targeted mutagenesis of *Burkholderia thailandensis* and *Burkholderia*  
656 *pseudomallei* through natural transformation of PCR fragments. Appl Environ  
657 Microbiol 74:2985-9.
- 658 34. Klaus JR, Deay J, Neuenswander B, Hursh W, Gao Z, Bouddhara T, Williams TD,  
659 Douglas J, Monize K, Martins P, Majerczyk C, Seyedsayamdost MR, Peterson  
660 BR, Rivera M, Chandler JR. 2018. Malleilactone is a *Burkholderia pseudomallei*  
661 virulence factor regulated by antibiotics and quorum sensing. J Bacteriol 200.  
662 pages?
- 663 35. Choi KH, Mima T, Casart Y, Rhol D, Kumar A, Beacham IR, Schweizer HP.  
664 2008. Genetic tools for select-agent-compliant manipulation of *Burkholderia*  
665 *pseudomallei*. Appl Environ Microbiol 74:1064-75.

- 666 36. Heeb S, Itoh Y, Nishijyo T, Schnider U, Keel C, Wade J, Walsh U, O'Gara F,  
667 Haas D. 2000. Small, stable shuttle vectors based on the minimal pVS1 replicon  
668 for use in gram-negative, plant-associated bacteria. *Mol Plant Microbe Interact*  
669 13:232-7.
- 670 37. Bankevich A, Nurk S, Antipov D, Gurevich AA, Dvorkin M, Kulikov AS, Lesin  
671 VM, Nikolenko SI, Pham S, Prjibelski AD, Pyshkin AV, Sirotkin AV, Vyahhi N,  
672 Tesler G, Alekseyev MA, Pevzner PA. 2012. SPAdes: a new genome assembly  
673 algorithm and its applications to single-cell sequencing. *J Comput Biol* 19:455-77.
- 674 38. Camacho C, Coulouris G, Avagyan V, Ma N, Papadopoulos J, Bealer K, Madden  
675 TL. 2009. BLAST+: architecture and applications. *BMC Bioinformatics* 10:421.
- 676 39. Sievers F, Wilm A, Dineen D, Gibson TJ, Karplus K, Li W, Lopez R, McWilliam  
677 H, Remmert M, Soding J, Thompson JD, Higgins DG. 2011. Fast, scalable  
678 generation of high-quality protein multiple sequence alignments using Clustal  
679 Omega. *Mol Syst Biol* 7:539.
- 680 40. Lépine F, Milot S, Groleau MC, Déziel E. 2018. Liquid chromatography/mass  
681 spectrometry (LC/MS) for the detection and quantification of N-acyl-L-  
682 homoserine lactones (AHLs) and 4-hydroxy-2-alkylquinolines (HAQs). *Methods*  
683 *Mol Biol* 1673:49-59.
- 684 41. Agarwal A, Kahyaoglu C, Hansen DB. 2012. Characterization of HmqF, a protein  
685 involved in the biosynthesis of unsaturated quinolones produced by *Burkholderia*  
686 *thailandensis*. *Biochemistry* 51:1648-57.
- 687 42. Lépine F, Milot S, Déziel E, He J, Rahme LG. 2004. Electrospray/mass  
688 spectrometric identification and analysis of 4-hydroxy-2-alkylquinolines (HAQs)  
689 produced by *Pseudomonas aeruginosa*. *J Am Soc Mass Spectrom* 15:862-9.
- 690 43. Drees SL, Ernst S, Belviso BD, Jagmann N, Hennecke U, Fetzner S. 2018. PqsL  
691 uses reduced flavin to produce 2-hydroxylaminobenzoylacetate, a preferred  
692 PqsBC substrate in alkyl quinolone biosynthesis in *Pseudomonas aeruginosa*. *J*  
693 *Biol Chem* 293:9345-9357.
- 694 44. Lépine F, Déziel E, Milot S, Rahme LG. 2003. A stable isotope dilution assay for  
695 the quantification of the *Pseudomonas* quinolone signal in *Pseudomonas*  
696 *aeruginosa* cultures. *Biochim Biophys Acta* 1622:36-41.
- 697 45. Hays EE, Wells IC, Katzman PA, Cain CK, Jacobs FA, Thayer SA, Doisy EA,  
698 Gaby WL, Roberts EC, Muir RD, Carroll CJ, Jones LR, Wade NJ. 1945.  
699 Antibiotic substances produced by *Pseudomonas aeruginosa*. *Biological*  
700 *Chemistry* 159:725-50.
- 701 46. Diggle SP, Lumjiaktase P, Dipilato F, Winzer K, Kunakorn M, Barrett DA,  
702 Chhabra SR, Camara M, Williams P. 2006. Functional genetic analysis reveals a  
703 2-alkyl-4-quinolone signaling system in the human pathogen *Burkholderia*  
704 *pseudomallei* and related bacteria. *Chem Biol* 13:701-10.



- 705 47. Machan ZA, Taylor GW, Pitt TL, Cole PJ, Wilson R. 1992. 2-Heptyl-4-  
706 hydroxyquinoline N-oxide, an antistaphylococcal agent produced by  
707 *Pseudomonas aeruginosa*. J Antimicrob Chemother 30:615-23.
- 708 48. Smirnova IA, Hagerhall C, Konstantinov AA, Hederstedt L. 1995. HOQNO  
709 interaction with cytochrome b in succinate:menaquinone oxidoreductase from  
710 *Bacillus subtilis*. FEBS Lett 359:23-6.
- 711 49. Nguyen AT, Jones JW, Ruge MA, Kane MA, Oglesby-Sherrouse AG. 2015. Iron  
712 depletion enhances production of antimicrobials by *Pseudomonas aeruginosa*. J  
713 Bacteriol 197:2265-75.
- 714 50. Mashburn LM, Jett AM, Akins DR, Whiteley M. 2005. *Staphylococcus aureus*  
715 serves as an iron source for *Pseudomonas aeruginosa* during *in vivo* coculture. J  
716 Bacteriol 187:554-66.
- 717 51. Korgaonkar A, Trivedi U, Rumbaugh KP, Whiteley M. 2013. Community  
718 surveillance enhances *Pseudomonas aeruginosa* virulence during polymicrobial  
719 infection. Proc Natl Acad Sci U S A 110:1059-64.
- 720 52. Mitchell G, Seguin DL, Asselin AE, Deziel E, Cantin AM, Frost EH, Michaud S,  
721 Malouin F. 2010. *Staphylococcus aureus* sigma B-dependent emergence of small-  
722 colony variants and biofilm production following exposure to *Pseudomonas*  
723 *aeruginosa* 4-hydroxy-2-heptylquinoline-N-oxide. BMC Microbiol 10:33.
- 724 53. Fugère A, Lalonde Séguin D, Mitchell G, Déziel E, Dekimpe V, Cantin AM,  
725 Frost E, Malouin F. 2014. Interspecific small molecule interactions between  
726 clinical isolates of *Pseudomonas aeruginosa* and *Staphylococcus aureus* from  
727 adult cystic fibrosis patients. PLoS One 9:e86705.
- 728 54. Hoffman LR, Déziel E, D'Argenio DA, Lepine F, Emerson J, McNamara S,  
729 Gibson RL, Ramsey BW, Miller SI. 2006. Selection for *Staphylococcus aureus*  
730 small-colony variants due to growth in the presence of *Pseudomonas aeruginosa*.  
731 Proc Natl Acad Sci U S A 103:19890-5.
- 732 55. Lightbown JW. 1954. An antagonist of streptomycin and dihydrostreptomycin  
733 produced by *Pseudomonas aeruginosa*. J Gen Microbiol 11:477-92.
- 734 56. Wu Y, Seyedsayamdost MR. 2017. Synergy and target promiscuity drive  
735 structural divergence in bacterial alkylquinolone biosynthesis. Cell Chem Biol  
736 24:1437-1444 e3.
- 737 57. Hooi DS, Bycroft BW, Chhabra SR, Williams P, Pritchard DI. 2004. Differential  
738 immune modulatory activity of *Pseudomonas aeruginosa* quorum-sensing signal  
739 molecules. Infect Immun 72:6463-70.
- 740 58. Bredenbruch F, Geffers R, Nimtz M, Buer J, Haussler S. 2006. The *Pseudomonas*  
741 *aeruginosa* quinolone signal (PQS) has an iron-chelating activity. Environ  
742 Microbiol 8:1318-29.

743

744 **Tables**

745 Table 1. Location of transposon insertions

746

---

747

| 748 | Mutant | Locus      | Gene            | Transposon insertion information |                       |
|-----|--------|------------|-----------------|----------------------------------|-----------------------|
|     |        |            |                 | Predicted function               | Location (bp in gene) |
| 749 | 14     | BTH_II1935 | <i>hmqA</i>     | 2-aminobenzoate-CoA ligase       | 1231                  |
| 750 | 27     | BTH_II1935 | <i>hmqA</i>     | 2-aminobenzoate-CoA ligase       | 1513                  |
| 751 | 31     | BTH_II1935 | <i>hmqA</i>     | 2-aminobenzoate-CoA ligase       | 1478                  |
| 752 | 68     | BTH_II1933 | <i>hmqC</i>     | Unknown                          | 783                   |
| 753 | 7      | BTH_II1933 | <i>hmqF</i>     | Polyketide synthase              | 163                   |
| 754 | 9      | BTH_II1930 | <i>hmqF</i>     | Polyketide synthase              | 2524                  |
| 755 | 63     | BTH_II1930 | <i>hmqF</i>     | Polyketide synthase              | 2872                  |
| 756 | 32     | BTH_II1576 | " <i>hmqL</i> " | Putative monooxygenase           | 226                   |
| 757 | 56     | BTH_II1576 | " <i>hmqL</i> " | Putative monooxygenase           | 998                   |

---

758

759

760 Table 2. Antimicrobial activities of hydroxyl-alkylquinoline analogs.

761

762

| 763 Quinolone family <sup>a</sup> | Carbon chain      | [M+H] <sup>+</sup> | Minimum Inhibitory Concentration <sup>b, c</sup> |                  |
|-----------------------------------|-------------------|--------------------|--------------------------------------------------|------------------|
|                                   |                   |                    | <i>B. subtilis</i>                               | <i>S. aureus</i> |
| 764 HMAQ                          | C <sub>9:2'</sub> | 284                | 50                                               | 25               |
| 765 HMAQ-NO                       | C <sub>9:2'</sub> | 300                | 0.75                                             | 25               |
| 766 HAQ (HHQ)                     | C <sub>7</sub>    | 242                | >200                                             | >200             |
| 767 HAQ-NO (HQNO)                 | C <sub>7</sub>    | 259                | 25                                               | 25               |
| 768 HMAQ-NO                       | C <sub>8:2'</sub> | 286                | 1.5                                              | 6.25             |
| 769 HMAQ-NO                       | C <sub>7:2'</sub> | 272                | 6.25                                             | 12.5             |

770 HMAQ with a C<sub>9</sub> carbon chain (HMAQC<sub>9:2'</sub>) was purified as described in (21).

771 HMAQ-NO congeners were synthesized as described in Materials and Methods and  
772 Piochon et al. (28). HAQ-NO with a C<sub>7</sub> carbon chain (HQNO) and HAQ with a C<sub>7</sub>  
773 carbon chain (HHQ) were commercially purchased (Cayman Chemicals and Sigma  
774 Aldrich, respectively).

775 <sup>b</sup>Results are the averages of three independent experiments. In all cases the range was  
776 <5%.

777 <sup>c</sup>No activity of any of the compounds was observed up to 200 µg/mL against  
778 *Pseudomonas aeruginosa* strain PA14 and *Escherichia coli* strain JM109

779

780

781 **Figure legends**

782 **Figure 1. Sensitivity of *Bacillus subtilis* to a substance produced by *Burkholderia***  
783 ***thailandensis*.** **A)** For liquid coculture growth, *B. subtilis* was combined in a 1:1 ratio with  
784 either *Burkholderia thailandensis* E264 (WT) or bactobolin-deficient *Burkholderia*  
785 *thailandensis* (Bacto<sup>-</sup>, strain BD20) in LB broth and grown for 24 h at 37 °C prior to  
786 plating to determine surviving colony forming units as described in Materials and  
787 Methods. Data are representative of three biological replicates. **B)** On plates, *B. subtilis*  
788 growth inhibition following treatment with cultures or culture fluid from *B. thailandensis*  
789 after 18 hr of growth. *B. thailandensis* wild type (E264) or the bactobolin-defective  
790 mutant (Bacto<sup>-</sup>, strain BD20) were applied to a lawn of freshly plated *B. subtilis* and  
791 plates were incubated at 30 °C prior to imaging. **Top panel:** *B. thailandensis* culture fluid  
792 was filtered and used to saturate paper diffusion discs applied to the *B. subtilis* lawn. A  
793 zone of clearing around a diffusion disc indicates the region where *B. subtilis* growth was  
794 inhibited. Results are similar to those previously reported (11). **Middle panel:** Unfiltered  
795 *B. thailandensis* fluid (10 µL) was spotted directly onto *B. subtilis*. **Bottom panel:**  
796 Unfiltered *B. thailandensis* fluid as in the middle panel was spotted onto a lawn of *B.*  
797 *subtilis* on media containing 5% NaCl, which inhibits *B. thailandensis* growth.

798

799 **Figure 2. *B. thailandensis* transposon mutants with reduced *Bacillus subtilis* killing.**

800 A) Unfiltered fluid (5 µl) from *B. thailandensis* stationary-phase cultures was spotted  
801 onto a lawn of freshly plated *B. subtilis* and incubated overnight at 30°C. Results are  
802 shown as the diameter of the zones of inhibition. The black dashed line indicates the  
803 diameter of the spot of *B. thailandensis* culture. Transposon mutant numbers correspond  
804 with mutant locations in **Table 1** and are shaded by gene. Dark grey, *hmqA* disruptions;  
805 light grey, *hmqC* disruption; white, *hmqF* disruption; hatched, BTH\_II1576 disruptions. P  
806 (parent), the *B. thailandensis* bactobolin-deficient mutant BD20 used for transposon  
807 mutagenesis. Data are the average of two biological replicates. B) Images of *B. subtilis*  
808 lawns spotted with 5 ul unfiltered fluid from cultures of the *B. thailandensis* bactobolin-  
809 deficient strain BD20 or BD20 with disruptions in *hmqA* or BTH\_II1576 introduced by  
810 homologous recombination.

811

812 **Figure 3. Biosynthesis of hydroxy-alkylquinolones.** *Burkholderia thailandensis* uses  
813 the *hmq* gene products to synthesize hydroxy-alkylquinolones, including HMAQ and  
814 HMAQ-NO. In *Pseudomonas aeruginosa*, analogous *pqs* genes synthesize the related  
815 compounds HAQ, HAQ-NO and PQS. Shown are the *N*-oxidated species referred to in  
816 the text, HQNO and HMAQ-NO C9 with a double bond at the 1'-2' position added by  
817 HmqF. The *B. thailandensis* compounds are methylated by HmqG, which does not have a  
818 homolog in *P. aeruginosa*. PqsH is needed for production of PQS, which is specific to *P.*  
819 *aeruginosa*.

820

821 **Figure 4. BTH\_III1576 (*hmqL*) involvement in HMAQ-NO production and *B. subtilis***  
822 **killing.** A) HMAQ-NO (C9) was quantified in stationary-phase *B. thailandensis* strains  
823 using LC-MS/MS and methods described previously (21). B) Antimicrobial activity of  
824 unfiltered *B. thailandensis* fluid (5  $\mu$ L) on a lawn of freshly plated *B. subtilis* on plates  
825 containing 1 mM IPTG. Strains tested were the *B. thailandensis* bactobolin-deficient  
826 BD20 with the IPTG-inducible *plac* expression cassette inserted into the neutral *glmS1*  
827 site in the genome (BD20 *plac*), the constructed BD20 *BTH\_III1576 (hmqL)* mutant with  
828 the *plac* cassette in *glmS1 (hmqL plac)*, or the BD20 *hmqL* mutant with *plac-hmqL* in  
829 *glmS1 (hmqL plac-hmqL)*.

830

831 **Figure 5. Involvement of BTH\_III1576 (*hmqL*) in *B. subtilis* killing in liquid co-**  
832 **cultures and its cell pellet fraction localization.** A) Results of co-cultures of *B. subtilis*  
833 combined in a 1:1 ratio with bactobolin-deficient *B. thailandensis* (Bacto<sup>-</sup>) parent strain  
834 or the parent strain bearing a constructed deletion in *hmqA*, *hmqL*, or both in LB broth  
835 and grown for 24 h at 37 °C. Surviving colony forming units (CFU) were enumerated by  
836 serial dilution and plating on LB agar containing, for *B. subtilis*, 5% NaCl (non-  
837 permissive for *B. thailandensis* growth) and for *B. thailandensis*, 100  $\mu$ g/mL gentamicin  
838 (non-permissive for *B. subtilis*). Data are representative of three biological replicates. B)  
839 C9 congeners of HMAQ and HMAQ-NO were quantified in unfiltered and filtered fluid  
840 from cell-free *B. thailandensis* cultures as well as in pelleted cells using LC-MS/MS and  
841 methods described previously (21).

842

843 **Figure 6. Heterologous expression of *hmqL* in *Burkholderia ambifaria*.** A) HMAQ  
844 and HMAQ-NO in cultures of *B. ambifaria* HSJ1 cells containing either pME6010 or  
845 pMP6010-*hmqL*. Results are the average of three biological replicates and represent the  
846 sum of the C7, C8, and C9 congeners of each molecule. B) Antimicrobial activity of  
847 unfiltered fluid (5 L $\mu$ L) from cultures of *Burkholderia ambifaria* HSJ1 containing  
848 pME6010 or pME6010-*hmqL* spotted onto a freshly spread lawn of *B. subtilis* on plates  
849 containing 1 mM IPTG. Plates were imaged after 24 h of incubation at 37 °C.

850

851 **Figures**

852 Fig. 1.

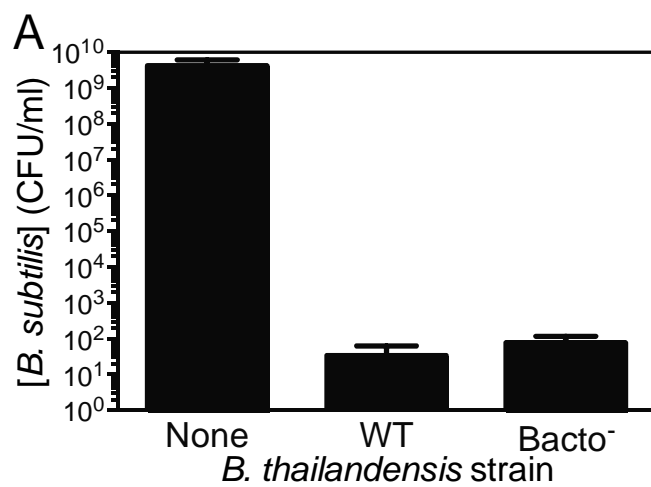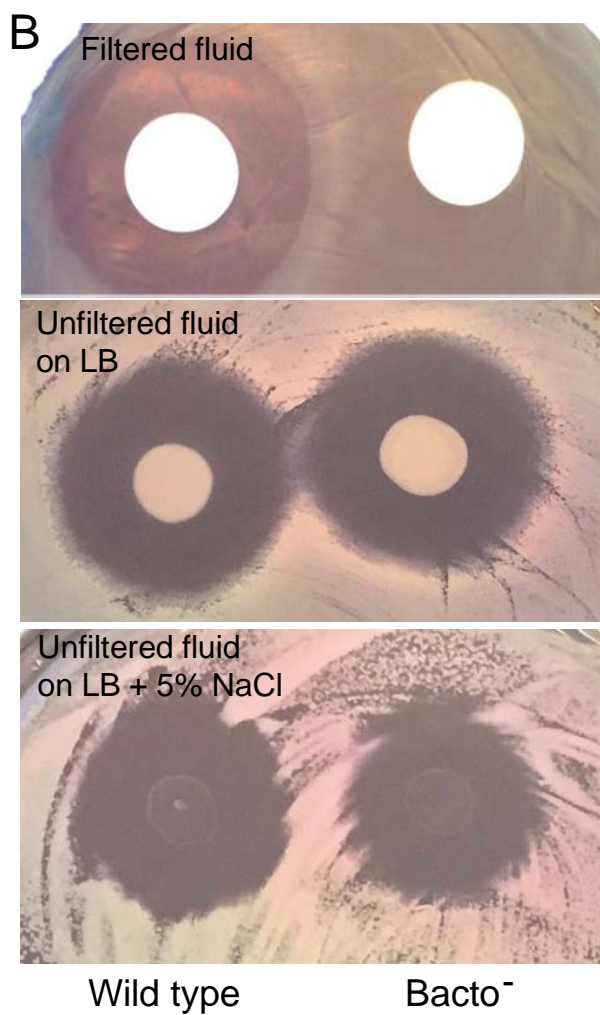

853



854

855 Fig. 2.

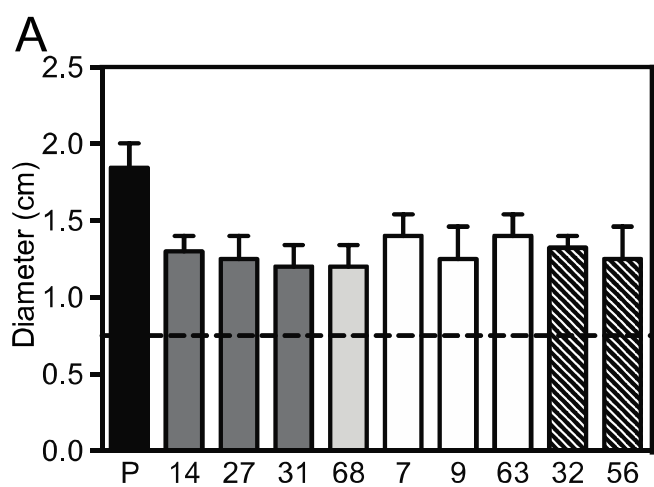

**B**

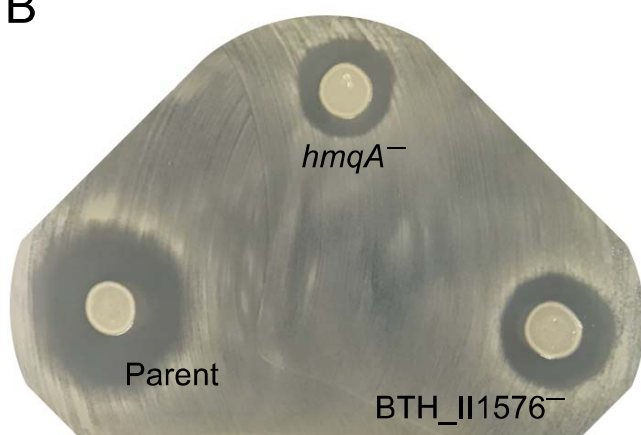

856

857

858 Fig. 3

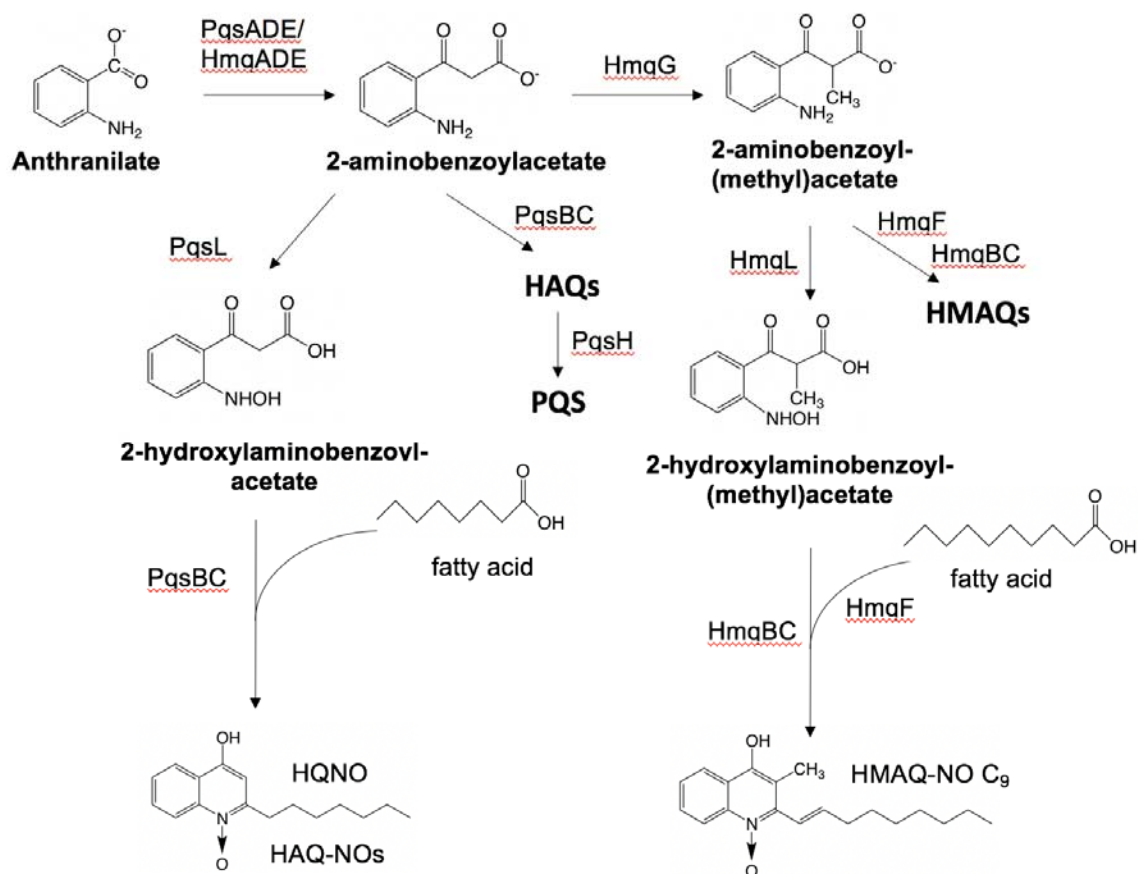

859

860

861 Fig. 4

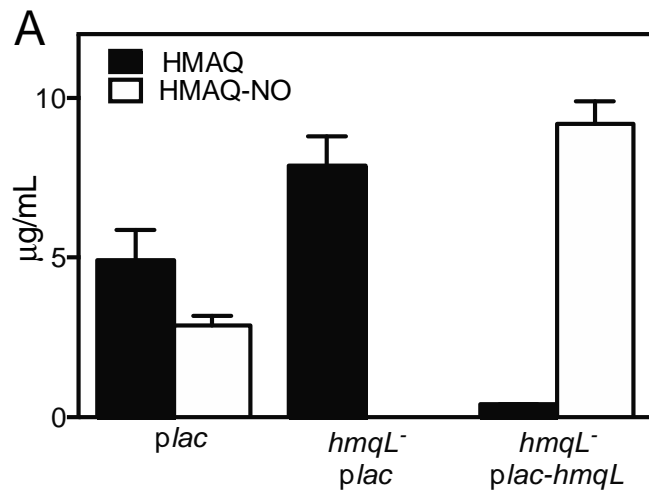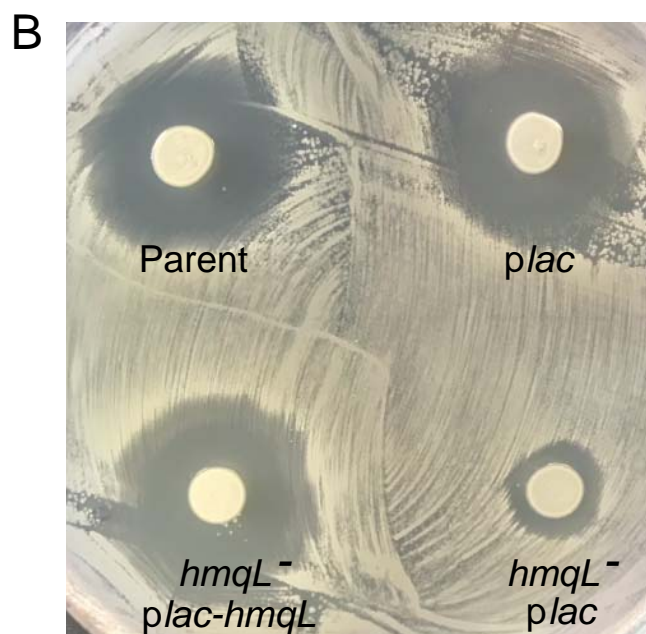

862

863

864

865

866

867

868

869

870

871 Fig. 5

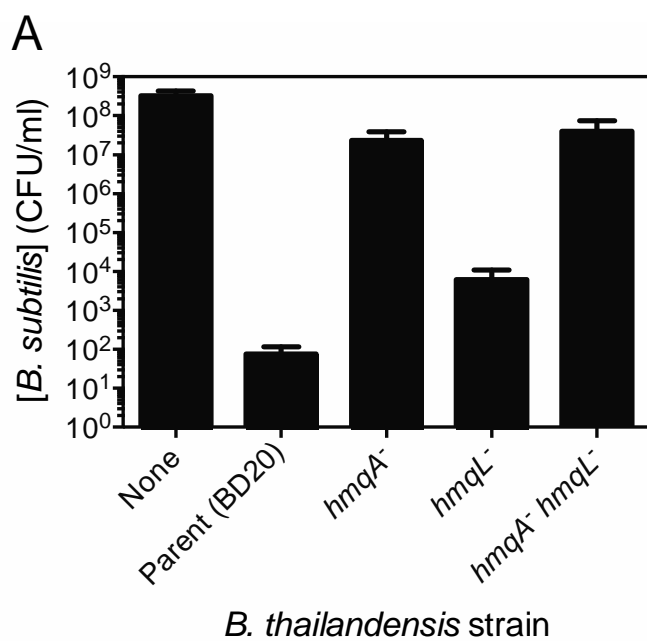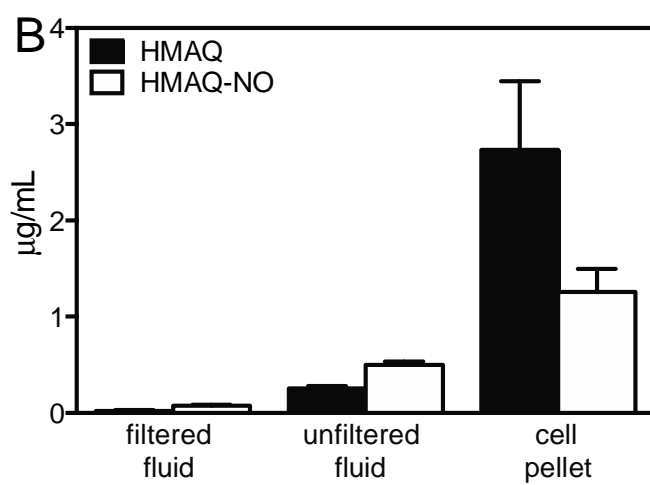

872

873

874

875 Fig. 6

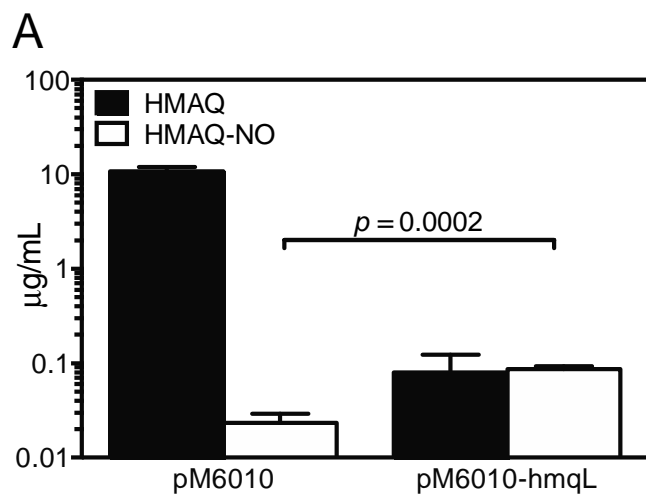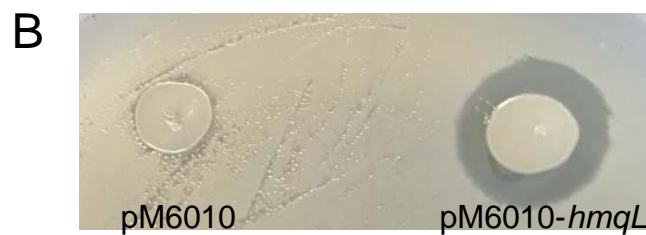

876

877

878
